# Supplementary material for: Antibiotic Exposure Aggravates Bacteroides-Linked Uremic Toxicity in the Gut-Kidney Axis
Source: Frontiers journal article supplement (doi:10.3389/fimmu.2022.737536), 2022-03-24
Supplement: Image_1.pdf [file Image_1.pdf]

A

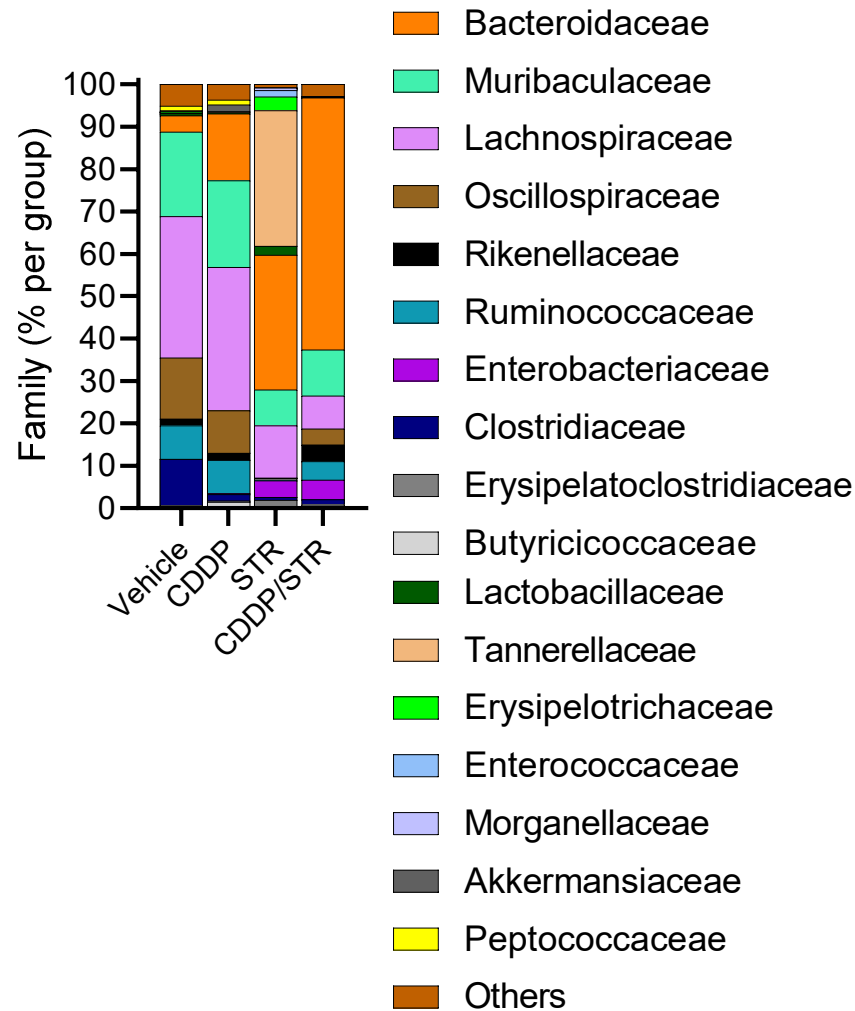

B

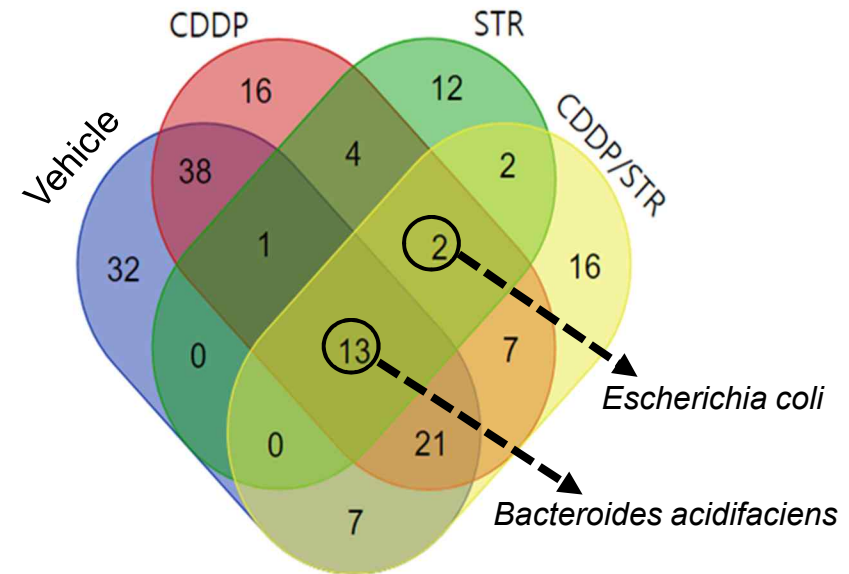

**Supplementary figure 1. Effects of STR exposure on the murine gut microbiota profile in CDDP-induced renal injury model.**

Eight-week-old wild type male mice (n = 3–5) were orally preexposed to the vehicle or streptomycin (20 mg/mouse) for 24 h and then renal injury was induced with CDDP (20 mg/kg) via intraperitoneal administration for an additional 72 h. **(A)** The fecal bacteria were subjected to 16S rRNA analysis for phylogenetic composition at the family level (the mean relative abundances of families). **(B)** Grouping of bacterial community in the experimental mice based on the ontological clustering.
